# Supplementary material for: Herpes Murine Model as a Biological Assay to Test Dialyzable Leukocyte Extracts Activity
Source: Hindawi journal article supplement (doi:10.1155/2015/146305), 2015-01-01
Supplement: f1 [file 146305.f1.pdf]

-log Dilution Factor

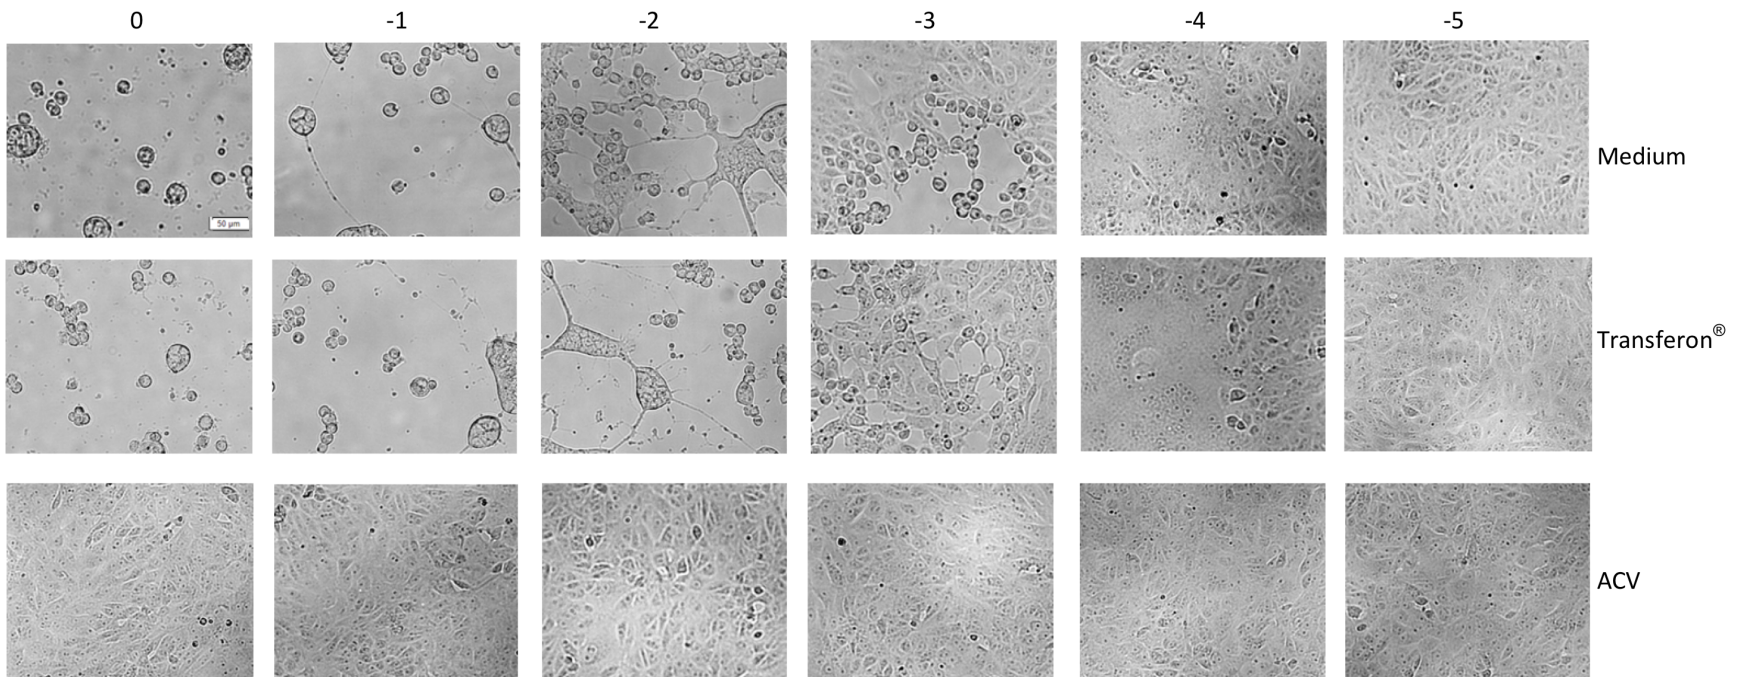

Supplemental Figure 1
